# Supplementary material for: Unique modulation effects on the performance of graphene-based ammonia sensors via ultrathin bimetallic Au/Pt layers and gate voltages
Source: Royal Society of Chemistry journal article supplement (doi:10.1039/d3cp01813j), 2023-01-01
Supplement: d3cp01813j1.pdf [file d3cp01813j1.pdf]

## Supplementary Information

### Unique Modulation Effects of Performance of Graphene-Based Ammonia Sensors via Ultrathin Bimetallic Au/Pt layers & Gate Voltages

Min Zhao,<sup>ab</sup> Yi Tian,<sup>b</sup> Lanqin Yan,<sup>b</sup> Rujun Liu,<sup>a</sup> Peipei Chen,<sup>\*bc</sup> Hanfu Wang,<sup>\*b</sup> Weiguo Chu<sup>\*bc</sup>

<sup>a</sup> School of Electronic and Electrical Engineering, Lingnan Normal University, Zhanjiang, Guangdong, 524048, China.

<sup>b</sup> Nanofabrication Laboratory, National Center for Nanoscience and Technology, Beijing 100190, P. R. China.

<sup>c</sup> Center of Materials Science and Optoelectronics Engineering, University of Chinese Academy of Sciences, Beijing, 100039, China.

\*Email: wgchu@nanoctr.cn, wanghf@nanoctr.cn, chenpp@nanoctr.cn

Figure S1. Optical photograph of pristine graphene (a), SEM pictures of channel area of Au/Gr (b), Pt/Gr (c) and Pt/Au/Gr devices (d), XPS full survey-scan spectra of pristine graphene (e), experimental and fitted XPS of Au/Gr surface (f), Pt/Gr surface (g), and Pt/Au/Gr surface (h).

Figure S2. (a) Micro-Raman spectra corresponding to A, B and C positions in Fig.S1(a), (b) micro-Raman spectra of Gr, Au/Gr, Pt/Gr and Pt/Au/Gr.

Figure S3. RT dynamic response curves of (a) Au/Gr, (b) Pt/Gr, and (c) Pt/Au/Gr devices, under the back gate voltage of +60 V upon 3 min exposure to NH<sub>3</sub> with various concentrations.

Figure S4. The polynomial fittings of response versus time plots at baseline for (a) Au/Gr, (b) Pt/Gr, and (c) Pt/Au/Gr devices.

Section S4: Calculations of LOD of Au/Gr, Pt/Gr and Pt/Au/Gr devices.

The LOD of device can be estimated through following formula. <sup>[1,2]</sup>

$$LOD = 3 \times \frac{RMS}{|Slope|}$$

Here, RMS is the noise level calculated from the polynomial fitting of the  $\Delta I/I_0$  versus time plots at baseline before exposure to test gas, and ‘Slope’ is the slope of calibration curve. The RMS can be estimated through following formula. <sup>[1,2]</sup>

$$RMS = \sqrt{\frac{\sum (a_i - a)^2}{N - 1}}$$

Taking  $N=35$  data points at the baseline and regular residual of polynomial fittings ( $a_i - a$ ).

Figure S5. RT response curves upon 3 min exposure to 5 ppm NO<sub>2</sub> gas under different  $V_{GS}$  for (a) Au/Gr, (b) Pt/Gr, and (c) Pt/Au/Gr devices.

Figure S6. RT response curves upon 3 min exposure to 200 ppm NH<sub>3</sub> gas at  $V_{GS}$  of +60V tested under different values of RH for (a) Au/Gr, (b) Pt/Gr, and (c) Pt/Au/Gr devices.

Figure S7. RT response curves at different days of devices upon 3 min exposure to 200 ppm NH<sub>3</sub> gas with  $V_{GS}$  = +60V and RH=20% for (a) Au/Gr, (b) Pt/Gr, and (c) Pt/Au/Gr devices.

Figure S8. The TDOS (a)~(e) and PDOS (f)~(j) of NH<sub>3</sub>-Au/Gr systems under different values of electric field intensity.

Figure S9. The TDOS (a)~(e) and PDOS (f)~(j) of NH<sub>3</sub>-Pt/Gr systems under different values of electric field intensity.

Figure S10. The TDOS (a)~(e) and PDOS (f)~(j) of NH<sub>3</sub>-Pt/Au/Gr systems under different values of electric field intensity.

Table S1. RT response to 200 ppm NH<sub>3</sub> gas for Au/Gr, Pt/Gr and Pt/Au/Gr devices under different back gate voltages.

| V <sub>G</sub> | -20 V   | 0 V     | +20 V   | +40 V   | +60 V   |
|----------------|---------|---------|---------|---------|---------|
| Au/Gr          | -9.29%  | -10.51% | -12.52% | -15.12% | -16.08% |
| Pt/Gr          | -16.51% | -17.53% | -17.47% | -17.50% | -17.47% |
| Pt/Au/Gr       | -8.23%  | -11.03% | -12.47% | -14.68% | -16.18% |

Table S2. Response time to 200 ppm NH<sub>3</sub> gas for Au/Gr, Pt/Gr and Pt/Au/Gr devices under different back gate voltages.

| V <sub>G</sub> | -20 V | 0 V   | +20 V | +40 V | +60 V |
|----------------|-------|-------|-------|-------|-------|
| Au/Gr          | 126 s | 120 s | 126 s | 114 s | 114 s |
| Pt/Gr          | 108 s | 126 s | 108 s | 108 s | 102 s |
| Pt/Au/Gr       | 108 s | 84 s  | 66 s  | 54 s  | 54 s  |

Table S3. Recovery time to 200 ppm NH<sub>3</sub> gas for Au/Gr, Pt/Gr and Pt/Au/Gr devices under different back gate voltages.

| V <sub>G</sub> | -20 V | 0 V | +20 V | +40 V | +60 V |
|----------------|-------|-----|-------|-------|-------|
|----------------|-------|-----|-------|-------|-------|

|          |         |        |         |         |          |
|----------|---------|--------|---------|---------|----------|
| Au/Gr    | >20 min | 28 min | 24 min  | 20 min  | 12.7 min |
| Pt/Gr    | >20 min | 26 min | 9.5 min | 6.2 min | 4.4 min  |
| Pt/Au/Gr | >20 min | 20 min | 16 min  | 6.7 min | 4.6 min  |

Table S4. RT responses of different devices at the back gate voltage of +60V upon 3 min exposure to NH<sub>3</sub> with various concentrations.

| V <sub>G</sub> | 12 ppm | 25 ppm | 50 ppm | 100 ppm | 200 ppm |
|----------------|--------|--------|--------|---------|---------|
| Au/Gr          | -4.8%  | -6.5%  | -9.1%  | -10.7%  | -16.08% |
| Pt/Gr          | -5.64% | -8.91% | -6.12% | -13.53% | -17.47% |
| Pt/Au/Gr       | -6.43% | -7.56% | -9.7%  | -12.25% | -16.18% |

Table S5. TDOS near near Fermi level of different systems at different electric field strengths.

| F(V/Å)                    | -2    | 0     | 2     | 4     | 6     |
|---------------------------|-------|-------|-------|-------|-------|
| NH <sub>3</sub> -Au/Gr    | 26.38 | 18.95 | 17.15 | 10.48 | 5.97  |
| NH <sub>3</sub> -Pt/Gr    | 22.75 | 19.18 | 19.03 | 20.03 | 21.56 |
| NH <sub>3</sub> -Pt/Au/Gr | 27.21 | 26.84 | 24.90 | 13.92 | 4.834 |

Table S6. E<sub>ads</sub> of different systems at different electric field strengths.

| F(V/Å)                    | 0         | 2         | 4         | 6         |
|---------------------------|-----------|-----------|-----------|-----------|
| NH <sub>3</sub> -Au/Gr    | -1.165 eV | -1.078 eV | -0.894 eV | -0.621 eV |
| NH <sub>3</sub> -Pt/Gr    | -1.766 eV | -1.231 eV | -0.843 eV | -0.301 eV |
| NH <sub>3</sub> -Pt/Au/Gr | -1.888 eV | -1.564 eV | -1.146 eV | -0.788 eV |

Table S7. Comparison of sensing performances to NH<sub>3</sub> gas for Pt/Au/Gr device in this work with those graphene-based gas sensors reported in the literature.

| Sensing materials                                             | Concentration of NH <sub>3</sub> | Detecting temperature | Response time | Response | Recovery time | References |
|---------------------------------------------------------------|----------------------------------|-----------------------|---------------|----------|---------------|------------|
| CVD graphene on aluminum oxide substrate                      | 1300 ppm                         | RT                    | 156 s         | 1.5%     | 2.2 min       | [3]        |
| Ag-NPs/ Graphene                                              | 500 ppm                          | RT                    | min           | 9.5%     | —             | [4]        |
| Ti-decorated CVD graphene                                     | 400 ppm                          | RT                    | 150 s         | 17.9%    | 3 min         | [5]        |
| Co(tpfpp)ClO <sub>4</sub> treated graphene                    | 160 ppm                          | RT                    | 60 s          | 8.34%    | —             | [6]        |
| Ester functionalized graphene oxide                           | 100 ppm                          | RT                    | 55 s          | 12%      | 1.3 min       | [7]        |
| 3D RGO/PANI hybrid                                            | 50 ppm                           | RT                    | 370 s         | 10.8%    | 11.3 min      | [8]        |
| $\alpha$ -Fe <sub>2</sub> O <sub>3</sub> /graphene nanohybrid | 50 ppm                           | 250°C                 | 70 s          | 26%      | 20.3 min      | [9]        |
| FMNS-functionalized graphene                                  | 1000 ppm                         | RT                    | 15 min        | 18.5%    | 16 min        | [10]       |
| Au-decorated CVD graphene                                     | 200 ppm                          | RT                    | 114 s         | 16.08%   | 12.7 min      | This work  |
| Pt-decorated CVD graphene                                     | 200 ppm                          | RT                    | 102 s         | 17.47%   | 4.4 min       | This work  |
| Pt/Au-decorated CVD graphene                                  | 200 ppm                          | RT                    | 54 s          | 16.18%   | 4.6 min       | This work  |

## References

- [1] J. Wu, S. L. Feng, Z. Li, K. Tao, J. Chu, J. M. Miao, L. Norford, *Sens. Actuators B: Chem.*, 2018, 255, 1805-1813.
- [2] M. Zhao, A. Falak, Y. Tian, L.Q.Yan, R. J. Liu, W. J. Chen, H. F. Wang, T. Wu, P. P. Chen, W. G. Chu, *Phys.Chem. Chem. Phys.*, 2020, 22, 25769-25779.
- [3] S. R. Huang, L. A. Panes-Ruiz, A. Croy, M. Löffler, V. Khavrus, V. Bezugly, G. Cuniberti, *Carbon*, 2021, 173, 262-270.
- [4] V. Haridas, A. Sukhananazerin, J. M. Sneha, B. Pullithadathil, B. Narayanan, *Appl. Surf. Sci.*, 2020, 517: 146158.

- [5] S. Tohidi, M. Parhizkar, H. Bidadi, R. Mohamad-Rezaei, *Nanotechnology*, 2020, 31: 415501.
- [6] R. Kumar, A. Kumar, R. Singh, R. Kashyap, R. Kumar, D. Kumar, M. Kumar, *Mater. Res. Express*, 2019, 6: 095618.
- [7] C. Mackin, V. Schroeder, A. Zurutuza, C. Su, J. Kong, T. M. Swager, Tomás Palacios, *ACS Appl. Mater. Interfaces*, 2018, 10, 16169-16176.
- [8] M. Zhao, L. Q. Yan, X. F. Zhang, L. H. Xu, Z. W. Song, P. P. Chen, F. L. Dong, W. G. Chu, *J. Mater. Chem. C*, 2017, 5, 1113-1120.
- [9] H. Song, X. Li, P. Cui, S. Guo, W. Liu, X. Wang, *Sens. Actuators B: Chem.*, 2017, 244, 124-130.
- [10] C. S. Yang, A. Mahmood, B. Kim, K. Shin, D. H. Jeon, J. K. Han, S. D. Bu, S. Park, W. J. Choi and B. Doudin, *2D Materials*, 2016, 3, 011007.
